# Supplementary material
Source: Research Square preprint supplement (doi:10.21203/rs.3.rs-9452775/v1)
Supplement: Supplementary file 1 [file 489dfd2e5005415904df9c75.docx]

| **Component** | **Definition** | | | |
| --- | --- | --- | --- | --- |
| **(1) Preoperative fasting** | For patients without restrictions on oral intake, continue solid food up to 8h, formula up to 6h, breastmilk up to 4h, and clear liquids up to 2h prior to induction of anesthesia. Shorter fasting intervals are acceptable. | | | |
| **(2) Optimal surgical technique** | Perform primary anastomosis for uncomplicated intestinal atresia (type I-IIIA atresia) repairs. | | | |
| **(3) Preventing hypothermia** | Continuously monitor and take pre-emptive measures (including Bair hugger, >74°F OR temperature, and IV fluid warmer) to prevent hypothermia (<36°C) upon transport and intraoperatively. | | | |
| **(4) Transfusion parameters** | Using written transfusion guidelines, restrict transfusions to:   - Hgb<9g/dL for a neonate/infant without significant O2 requirement (</= 4L HFNC) - Hgb<11g/dL for neonates/infants within 1 week of life who are:   - Either <37wks   - Or intubated or have a significant O2 requirement (>/= 4L HFNC)   More restrictive thresholds are acceptable. | | | |
| **(5) Surgical skin site preparation** | Use chlorhexidine-based skin preparation to prepare the surgical site in patients >35 weeks’ gestation. | | | |
| **(6) Antimicrobial prophylaxis** | - Administer preoperative antibiotic prophylaxis (e.g., cefazolin (Ancef) +/- metronidazole (Flagyl)) within 60min prior to skin incision. - Discontinue antibiotics within 24h of surgery, unless indicated for a reason other than surgical prophylaxis. | | | |
| **(7) Perioperative ventilation** | In patients who are intubated only for the surgery, aim for postoperative extubation by POD 1. | | | |
| **(8) Perioperative glucose control** | Give perioperative glucose to avoid hypoglycemia. Tight glucose control with insulin infusions is not routinely recommended. | | | |
| **(9) Enteral feeds** | - When gastric output is <20mL/kg/day, start trophic feeds at minimum of 10mL/kg/day. - Advance at minimum of 10mL/kg/day, unless not tolerated. Do not wait for stool output. - *Indications for****not****tolerating include: significant increase in abdominal distention or significant change in abdominal exam; stoma or stool output of >30-40mL/kg/day, blood in stool; repeated or bilious emesis; concerns based on radiographical findings (e.g., pneumatosis developing, change in bowel dilation, stagged loops of air fluid levels)* - Administering higher volumes with initiation and advancement of feeds is acceptable. | | | |
| **(10) Limited opioid use** | Avoid continuous or scheduled opioids post-operatively. If IV opioids are used, administer PRN, based on a validated pain scale [i.e., Neonatal Infant Pain Scale (NIPS), Neonatal Pain, Agitation, and Sedation Scale (N-PASS), or Bernese Pain Scale for Neonates (BPSN)] and discontinue within 72 hours of surgery. | | | |
| **(11) Non-opioid pharmacologic postoperative analgesia** | - Unless contraindicated, administer regularly scheduled acetaminophen 10-15 mg/kg (oral, intravenous, rectal) q6h postoperatively. - Consider prescribing additional non-opioid option(s) (e.g., dexmedetomidine (Precedex), clonidine, gabapentin, or ketorolac (Toradol)) | | | |
| **(12) Regional block use** | Use regional anesthesia (e.g., caudal, epidural, spinal, peripheral nerve block) in any patient undergoing an open operation. | | | |
| **(13) Lingual sugar use** | Provide lingual sucrose/dextrose or breast milk to reduce pain during minor procedures (e.g., enteral tube placement, blood draws, simple dressing changes, patient repositioning, PIV placement). | | | |
| **(14) Parental involvement** | Ensure individualized parental involvement by:   - Engaging parents/caregivers within 24h of admission to seek preferences, assessing needs, and formalizing the communication process (including points of contact, timing, and format). - Educating parents/caregivers on techniques for how to interact with their baby (e.g., G-tube/stoma teaching, monitoring vitals, skin-to-skin contact" | | | |
| **(15) Team communication and processes** | Prior to NICU-OR transition of care:   - Provide notification to all receiving team members at least 15-30 minutes before transition - Assure that all receiving team members are represented - Use standardized pre- and post-operative checklists - Hold both pre- and post-operative "huddle" | | | |
| **(16) Discharge coordination** | Arrange for follow-up within 48-72 hours after discharge, by a home health provider or primary care provider through a phone call, telemedicine, office visit, or home visit. | | | |
|  | |  |  |
| **(17) Perioperative fluid management**  **EXPLORATORY** | Use a perioperative goal-directed fluid management strategy including:   - Give D10 IVF within the first 48 hours of life. After 48 hours, add sodium and potassium to maintain normal electrolytes. - Maintain urine output of at least 0.5 mL/kg/hour. - Monitor electrolytes every 24-48 hours | | | |
| **(18) Urine electrolyte monitoring**  **EXPLORATORY** | Consider monitoring urinary sodium in all neonates/ infants with a stoma with high output (>20mL/kg/day) and/or inadequate weight gain (<10g/day). Urinary sodium should be >20 mmol/L and exceeds urinary potassium. | | | |
| **(19) Mucous fistula re-feeding**  **survey**  **EXPLORATORY** | Use mucous fistula re-feeding in neonates with enterostomy to improve growth and prepare for reversal. | | | |
